# Supplementary material for: Solvothermal synthesis of MoS2 nanospheres in DMF–water mixed solvents and their catalytic activity in hydrocracking of diphenylmethane
Source: Royal Society of Chemistry journal article supplement (doi:10.1039/c5ra08424e), 2015-01-01
Supplement: c5ra08424e1.pdf [file c5ra08424e1.pdf]

## Supporting information

*for*

### Solvothermal Synthesis of MoS<sub>2</sub> Nanospheres in DMF-Water Mixed Solvents and Their Catalytic Activity in Hydrocracking of Diphenylmethane

Hui Du,<sup>a</sup> Dong Liu,<sup>\*a</sup> Min Li,<sup>a</sup> Raja L. AL Otaibi,<sup>\*b</sup> Renqing Lv<sup>c</sup> and Yadong Zhang<sup>a</sup>

a. State Key Laboratory of Heavy Oil Processing, China University of Petroleum, Qingdao 266555, Shandong, P. R. China. E-mail: ldongupc@vip.sina.com; Tel: +86-532-86984629

b. Petrochemical Research Institute, P.O. Box 6086 Riyadh 11442, King Abdulaziz City for Science and Technology, Kingdom of Saudi Arabia. E-mail: raletabi@kacst.edu.sa.

c. College of Science, China University of Petroleum, Qingdao 266555, Shandong, P. R. China.

#### Material and methods

##### Ionic liquid-assisted solvothermal synthesis

The ionic liquid [EMIM]Br was synthesized according to the literature.<sup>1</sup> The experiment scheme was arranged as follows. Both 0.5 mmol of (NH<sub>4</sub>)<sub>6</sub>Mo<sub>7</sub>O<sub>24</sub>·4H<sub>2</sub>O and 10 mmol of CS(NH<sub>2</sub>)<sub>2</sub> were dissolved in  $V_2$  ml of distilled water, then 6 ml of [EMIM]Br and  $V_1$  ml of DMF was injected into the above solution under agitation. The total volume of DMF and distilled water ( $V_1$  and  $V_2$ ) was 54 ml. 12 mol·L<sup>-1</sup> of hydrochloric acid was used to adjust the pH of solution less than 1. Then the above solution was transferred in a 100 ml Teflon-lined stainless steel autoclave after 30 min of ultrasonic treatment. Solvothermal reaction was carried out at 200 °C for 24 h. After chilling, the black precipitates were washed with distilled water and ethyl alcohol three times to remove the unreacted reactants and solvents, and finally dried at 50 °C for 4 h in a vacuum oven. The prepared MoS<sub>2</sub> products were annealed in tube furnace at 700 °C for 2 h in the mixed atmosphere of N<sub>2</sub>/H<sub>2</sub> (9/1, v/v).

## Physical characterization

XRD analysis was performed on a PANalytical X Pert PRO MPD X-ray diffraction using Cu K $\alpha$  radiation ( $\lambda = 0.15418$  nm) with  $2\theta$  ranging from 5° to 65°. TEM and HRTEM images were taken with a JEOL JEM-2100F transmission electron microscope operated at an accelerating voltage of 200 KV. A Japan Hitachi S-4800 field-emission scanning electron microscope were used to obtain the SEM images of as-prepared MoS<sub>2</sub> samples. The Brunauer-Emmett-Teller (BET) surface area measurements were carried out by N<sub>2</sub> adsorption at 77 K using a Quantachrome NOVA 3000 system.

## Catalytic activity

Diphenylmethane (DPM, 99%), which was obtained from Aladdin Industrial Inc. and used without further purification, was used to appraise the catalytic activity of the prepared MoS<sub>2</sub> samples. In each experiment, 30 g of DPM and 0.5 g of MoS<sub>2</sub> samples were loaded in a 100 ml batch-type autoclave with an electromagnetic stirrer. After being purged by hydrogen for 3 times, the autoclave was charged with hydrogen to 5.0 MPa at room temperature. Subsequently, the autoclave was heated to reaction temperature in 30 min and kept for 1 h. At the end of each experiment, the autoclave was cooled rapidly to room temperature in water, and the residual hydrogen was vented out. The composition of hydrocracking products was quantified by a Varian CP3800 gas chromatography (GC). DPM hydrocracking with different catalysts were performed 3 times, and the values reported were the average values.

## References

- 1 K. Su, X. Liu, M. Ding, Q. Yuan, Z. Li and B. Cheng, *J. Mol. Catal. A-Chem.*, 2013, **379**, 350-354.
